# Supplementary material for: Immunohistochemical Detection of a Unique Protein within Cells of Snakes Having Inclusion Body Disease, a World-Wide Disease Seen in Members of the Families Boidae and Pythonidae
Source: PLOS journal article supplement (doi:10.1371/journal.pone.0082916), 2013-12-10
Supplement: S3 (10.1371/journal.pone.0082916.s003) [file journal.pone.0082916.s003]

Table S2. IHC score of tissues processed by two laboratories using different AR treatments.

| Tissue embedded | Primary antibody        | Sample origin   | AR reagents |         |         |            |            |         |
|-----------------|-------------------------|-----------------|-------------|---------|---------|------------|------------|---------|
|                 |                         |                 | No AR       | Trypsin | Trilogy | Dako pH9.0 | Dako pH6.0 | Citrate |
| Lab 1           | MAB                     | 08-122 Pancreas | 2           | 3       | 3       | 2          | 2          | 2       |
| Lab 2           | MAB                     | 08-122 Pancreas | 0           | 0       | 3       | 2          | 2          | 2       |
| Lab 2           | MAB                     | 08-76 Pancreas  | 1           | 1       | 3       | 2          | 3          | 3       |
| Lab 1           | None specific mouse IgG | 08-122 Pancreas | 0           | 0       | 0       | 0          | 0          | 0       |

MAB: monoclonal anti-IBDP antibody.

Boa 08-76 and 08-122 were two IBD+ boa constrictors, the MAB was produced against the inclusion bodies isolated from boa 08-76.
