# Supplementary material for: Immunohistochemical Detection of a Unique Protein within Cells of Snakes Having Inclusion Body Disease, a World-Wide Disease Seen in Members of the Families Boidae and Pythonidae
Source: PLoS One. 2013 Dec 10;8(12):e82916. doi: 10.1371/journal.pone.0082916 (PMC3858296; doi:10.1371/journal.pone.0082916)
Supplement: Table S1 — The tissue processing procedure in two laboratories. (PDF) [file pone.0082916.s002.pdf]

Table S1. The tissue processing procedure in two laboratories.

| Reagent      | Lab1 Processor              |                   |             | Lab2 Processor              |                   |             |
|--------------|-----------------------------|-------------------|-------------|-----------------------------|-------------------|-------------|
|              | Incubated Time<br>(sec/run) | Number of<br>runs | Temperature | Incubated Time<br>(sec/run) | Number of<br>runs | Temperature |
| Formalin     | 30                          | 2                 | Ambient     | N/A                         | N/A               | N/A         |
| 70% EtOH     | 60                          | 1                 | 30°C        | 1                           | 1                 | Ambient     |
|              |                             |                   |             | 20                          | 1                 | Ambient     |
| 80% EtOH     | 60                          | 1                 | 30°C        | 20                          | 1                 | Ambient     |
| 95% EtOH     | 60                          | 1                 | 30°C        | 20                          | 2                 | Ambient     |
| 100% EtOH    | 60                          | 3                 | 30°C        | 20                          | 2                 | Ambient     |
| Xylene       | 40                          | 3                 | 30°C        | 20                          | 2                 | Ambient     |
| Paraffin Wax | 40                          | 3                 | 60°C        | 20                          | 3                 | 60°C        |

EtOH: ethanol. N/A: not applicable.

In Lab1, the reagents used were Alcohol (Decon Laboratories), Histology Grade Xylene (Fisher), and Paraplast (Fisher). Formalin was made with 37% Formaldehyde (Fisher), Sodium Phosphate Monobasic anhydrous (MP laboratories), and Sodium Phosphate Dibasic, anhydrous (Fisher).

In Lab2, the reagents used were NBF 10% buffered (Fisher), Ethanol (Fisher), Histology Grade Xylene (Fisher), and Paraffin Type9 (Fisher).
